1 **Submission for PLoS ONE**

2

3 **Phenotypic divergence between the cultivated apple (*Malus domestica*) and its primary wild**  
4 **progenitor (*Malus sieversii*)**

5

6 Thomas Davies<sup>1</sup>, Sophie Watts<sup>1</sup>, Kendra McClure<sup>1</sup>, Zoë Migicovsky<sup>1</sup> & Sean Myles<sup>1</sup>

7 Affiliations:

8 <sup>1</sup> Department of Plant, Food, and Environmental Sciences, Faculty of Agriculture, Dalhousie  
9 University, Truro, NS, Canada

10

11 **ABSTRACT**

12 An understanding of the relationship between the cultivated apple (*Malus domestica*) and  
13 its primary wild progenitor species (*M. sieversii*) not only provides an understanding of how  
14 apples have been improved in the past, but may be useful for apple improvement in the future.  
15 We measured 10 phenotypes in over 1000 unique apple accessions belonging to *M. domestica*  
16 and *M. sieversii* from Canada's Apple Biodiversity Collection. Using principal components  
17 analysis (PCA), we determined that *M. domestica* and *M. sieversii* differ significantly in  
18 phenotypic space and are nearly completely distinguishable as two separate groups. We found  
19 that *M. domestica* had a shorter juvenile phase than *M. sieversii* and that cultivated trees  
20 produced flowers and ripe fruit later than their wild progenitors. Cultivated apples were also 3.6  
21 times heavier, 43% less acidic, and had 68% less phenolic content than wild apples. Using  
22 historical records, we found that apple breeding over the past 200 years has resulted in a trend  
23 towards apples that have higher soluble solids, are less bitter, and soften less during storage. Our

24 results quantify the significant changes in phenotype that have taken place since apple  
25 domestication, and provide evidence that apple breeding has led to continued phenotypic  
26 divergence of the cultivated apple from its wild progenitor species.

27

## 28 INTRODUCTION

29 The domesticated apple (*Malus domestica*) belongs to the genus *Malus*, which consists of  
30 30-55 interfertile species that grow primarily in temperate climates. Archaeological evidence  
31 suggests that apples have been cultivated for at least 3,000 years [1] and that they have had  
32 immense cultural, religious, culinary and economic importance for centuries [2–4]. Genomic  
33 evidence suggests that as apples were transported west into Europe along the Silk Road from  
34 Central Asia, hybridization and introgression from multiple *Malus* species created the modern  
35 cultivated apple (*M. domestica*) [2,5]. While there has been introgression from multiple species,  
36 including *Malus sylvestris* and *Malus baccata*, to the *M. domestica* genome, *Malus sieversii* of  
37 Kazakhstan is widely recognized as the primary ancestor of the cultivated apple [5–7].

38 Today, the cultivated apple is the 3rd most produced fruit crop in the world [8].  
39 Accordingly, apple fruit quality and phenology traits have been a major focus for breeding  
40 programs around the world [9–11], and both wild and domesticated germplasm are routinely  
41 evaluated for their potential use by apple breeders [12,13]. Traits such as precocity, harvest date  
42 and flowering date have practical implications for apple producers, as these traits influence  
43 investment timelines, crop quality and fruit damage risk. Weight, firmness, sugar content, acidity  
44 and phenolic content are important considerations for processors and consumers, who have  
45 specific preferences for these quality attributes when choosing to purchase apples [14]. Many of

46 these fruit quality traits have been targets for improvement in breeding programs around the  
47 world, and current genetic mapping efforts remain focused on these phenotypes [15–17].

48 Cost-effective trait improvement in apples is critical since the investment costs of  
49 growing apple trees are high. Apple trees are large plants with a long juvenile phase: new trees  
50 often only start bearing fruit 5 years into the life cycle, requiring growers to invest heavily before  
51 generating revenue. Thus, producers typically grow only thoroughly evaluated and historically  
52 successful apple varieties. As a result, a small number of well-established varieties dominate the  
53 cultivated population. For example, in 2019 over 50% of all commercially produced apples in the  
54 US consisted of only 4 apple cultivars [18]. The global population of apples is dominated by a  
55 small number of elite varieties, despite an immense source of genetic and phenotypic diversity  
56 available for apple improvement [19]. Decreased diversity in apples, and agricultural crops more  
57 broadly, has resulted in an increased interest in the use of crop wild relatives (CWRs) for  
58 agricultural improvement. CWRs offer genetic and phenotypic diversity that can be leveraged in  
59 the breeding of novel cultivars with desirable traits such as disease resistance or flesh colour  
60 [20]. By 1997 the world economy had gained approximately \$115 billion in benefits from the use  
61 of CWRs as sources of resistance to environmental change and disease [21]. An understanding of  
62 how fruit quality and phenology vary within the cultivated apple's wild relatives is essential to  
63 future apple improvement.

64 Phenotyping large and diverse populations of plants is labour intensive and frequently  
65 results in a “phenotyping bottleneck” [22], leaving crop researchers without powerful fruit  
66 quality data for analysis. Recently, comprehensive phenotyping of Canada's Apple Biodiversity  
67 Collection (ABC) generated measurements for fruit phenotypes in a collection of more than 1000  
68 wild and cultivated apple accessions [23]. In the present work, we explored ten phenotypes from

69 the ABC and determined the degree to which the cultivated apple differed from its primary wild  
70 progenitor, *M. sieversii*, and how cultivated apples have changed over the past 200 years of  
71 breeding and improvement.

72

## 73 MATERIALS AND METHODS

74

### 75 *Phenotype data*

76 The phenotype data analysed here were collected from Canada's Apple Biodiversity  
77 Collection (ABC) and were part of previously published work [23]. Briefly, the ABC is an apple  
78 germplasm collection located at the Agriculture and Agri-Food Canada (AAFC) Kentville  
79 Research Station in Nova Scotia, Canada (45.071767, -64.480466). The ABC contains 1119  
80 unique accessions of apples planted in duplicate on M.9 rootstock in an incomplete randomized  
81 block design. The apple accessions in the ABC consist of accessions from the United States  
82 Department of Agriculture (USDA) Plant Genetic Resources Unit apple germplasm collection in  
83 Geneva, NY, USA; commercial cultivars from the Nova Scotia Fruit Growers' Association  
84 Cultivar Evaluation Trial; and diverse breeding material from AAFC Kentville. The orchard  
85 consists largely of *M. domestica* accessions, but also contains 78 *M. sieversii* accessions.

86 Phenotype data from the ABC were collected in 2016 and 2017 [23]. Here we focus on  
87 10 phenotypes most relevant for assessing how apples have changed during domestication,  
88 breeding and improvement. Precocity was measured as a score of 1-4, indicating year of bloom;  
89 1 (2014), 2 (2015), 3 (2016) and score 4 indicated that the tree had not yet bloomed as of 2016.  
90 Flowering date was measured in 2016 as the date in Julian days when the youngest wood  
91 displayed >80% of flowers at king bloom stage. Since it often took more than one day to harvest

92 the entire orchard, harvest date was recorded in Julian days as the Monday of the week of  
93 harvest. Firmness was measured as the average firmness in kg/cm<sup>2</sup> at harvest of five apples  
94 measured using a penetrometer. Weight was measured as the average weight in grams of five  
95 apples at harvest. Acidity was measured as the malic acid content in mg/mL of combined juice  
96 from five apples measured using titration. Soluble solids were measured as °Brix of the juice of  
97 five apples using a refractometer. Phenolic content was measured as µmol GAE/g of fresh  
98 weight. Percent acidity change was measured by subtracting the acidity at harvest from the  
99 acidity after 90 days storage and then dividing by the acidity at harvest. Percent firmness change  
100 was measured by subtracting the firmness at harvest from the firmness after 90 days storage and  
101 then dividing by the firmness at harvest. Sample sizes for each phenotype are listed in Table 1.

102

103 **Table 1. Sample sizes by phenotype.**

104

| <b>Phenotype</b>                    | <b><i>M. domestica</i></b> | <b><i>M. sieversii</i></b> |
|-------------------------------------|----------------------------|----------------------------|
| Precocity                           | 797                        | 76                         |
| Flowering Date                      | 768                        | 74                         |
| Harvest Date                        | 647                        | 59                         |
| Firmness                            | 644                        | 59                         |
| Weight                              | 644                        | 58                         |
| Acidity                             | 626                        | 56                         |
| Soluble Solids                      | 644                        | 56                         |
| Phenolic Content                    | 399                        | 9                          |
| % Change in acidity during storage  | 449                        | 19                         |
| % Change in firmness during storage | 409                        | 27                         |

105

106

107

108 *Data analysis*

109           Principal components analysis (PCA) was conducted using a scaled and centered matrix  
110 of the 10 phenotypes listed in Table 1 using the `prcomp()` function in R 4.0.2 [24]. A Wilcoxon  
111 signed-rank test was used to determine whether the phenotypes and PC values differed  
112 significantly between wild and cultivated apples.

113           A Pearson correlation was used to assess relationships between phenotypes and the  
114 release year of cultivated apples. Where appropriate, the significance threshold was Bonferroni-  
115 corrected to account for 10 comparisons. Data visualization was performed using the `ggplot2` R  
116 package [25].

117

118 RESULTS

119

120           PCA of the 10 phenotypes revealed modest overlap between cultivated and wild apples in  
121 phenotypic space (Fig. 1A, 1B). Wild and cultivated apples were significantly different along  
122 PC1 ( $W = 53893$ ,  $p = 3.56 \times 10^{-26}$ ), PC2 ( $W = 13066$ ,  $p = 2.07 \times 10^{-17}$ ) and PC3 ( $W = 39203$ ,  $p$   
123  $= 0.0002$ ; Fig. 1C).

124

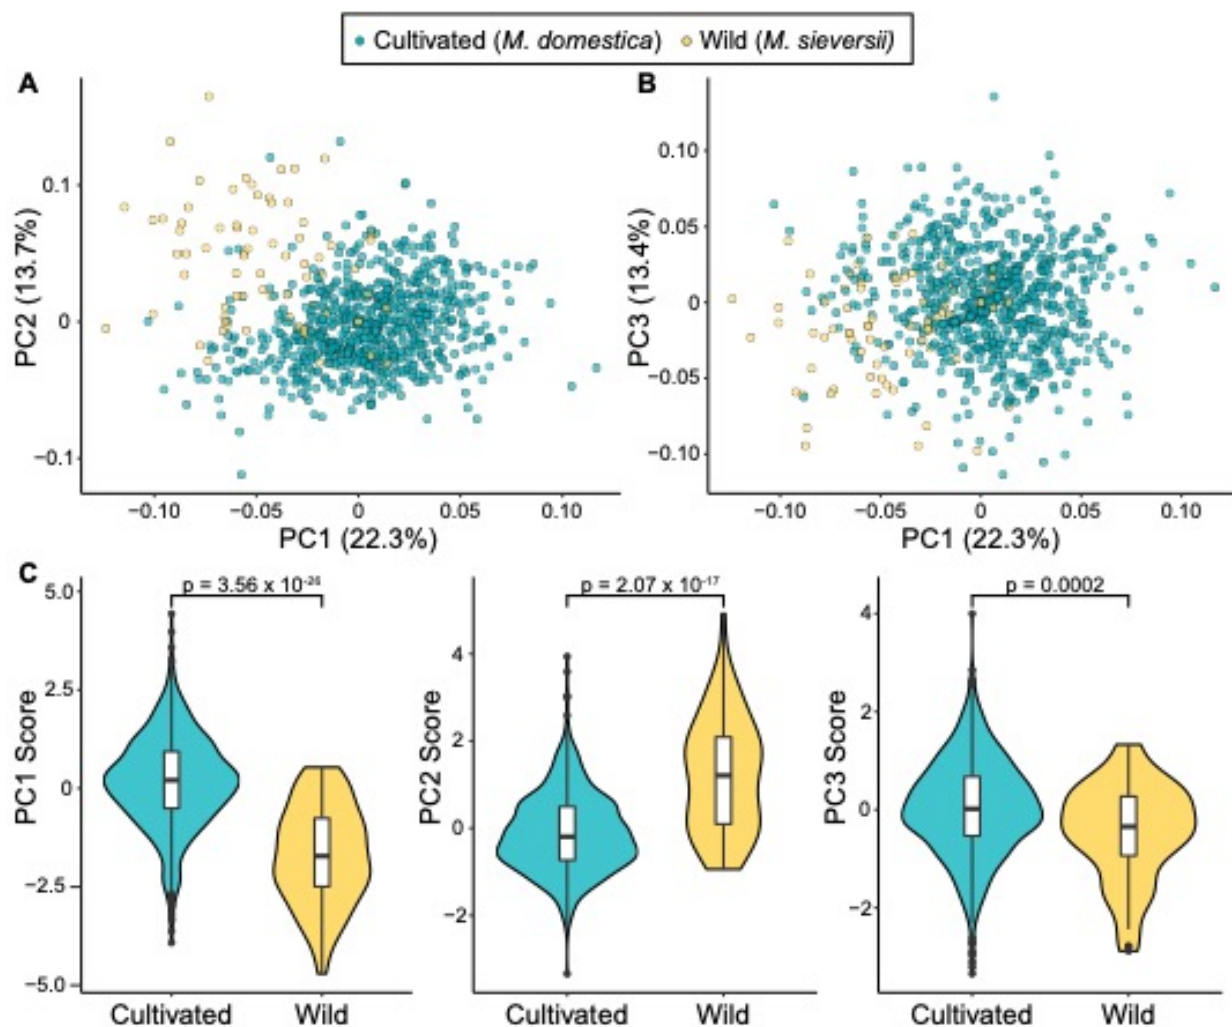

125

126 **Fig 1. PCA of ten phenotypes in wild (N = 79) and cultivated apples (N = 801).** A) PC1 vs

127 PC2. B) PC1 vs PC3. The proportion of the variance explained by each PC is shown in

128 parentheses on each axis. C) The difference between wild and cultivated apples for PCs 1, 2 and

129 3 are shown as violin plots. P values from a Wilcoxon test comparing PC values between

130 cultivated and wild apples are shown for each of the first three PCs.

131

132 To visualize and assess the difference between cultivated and wild apples for each individual  
133 phenotype, we produced density plots to visualize each species' distribution for each phenotype  
134 and tested whether phenotypes differed between the two species (Fig. 2).



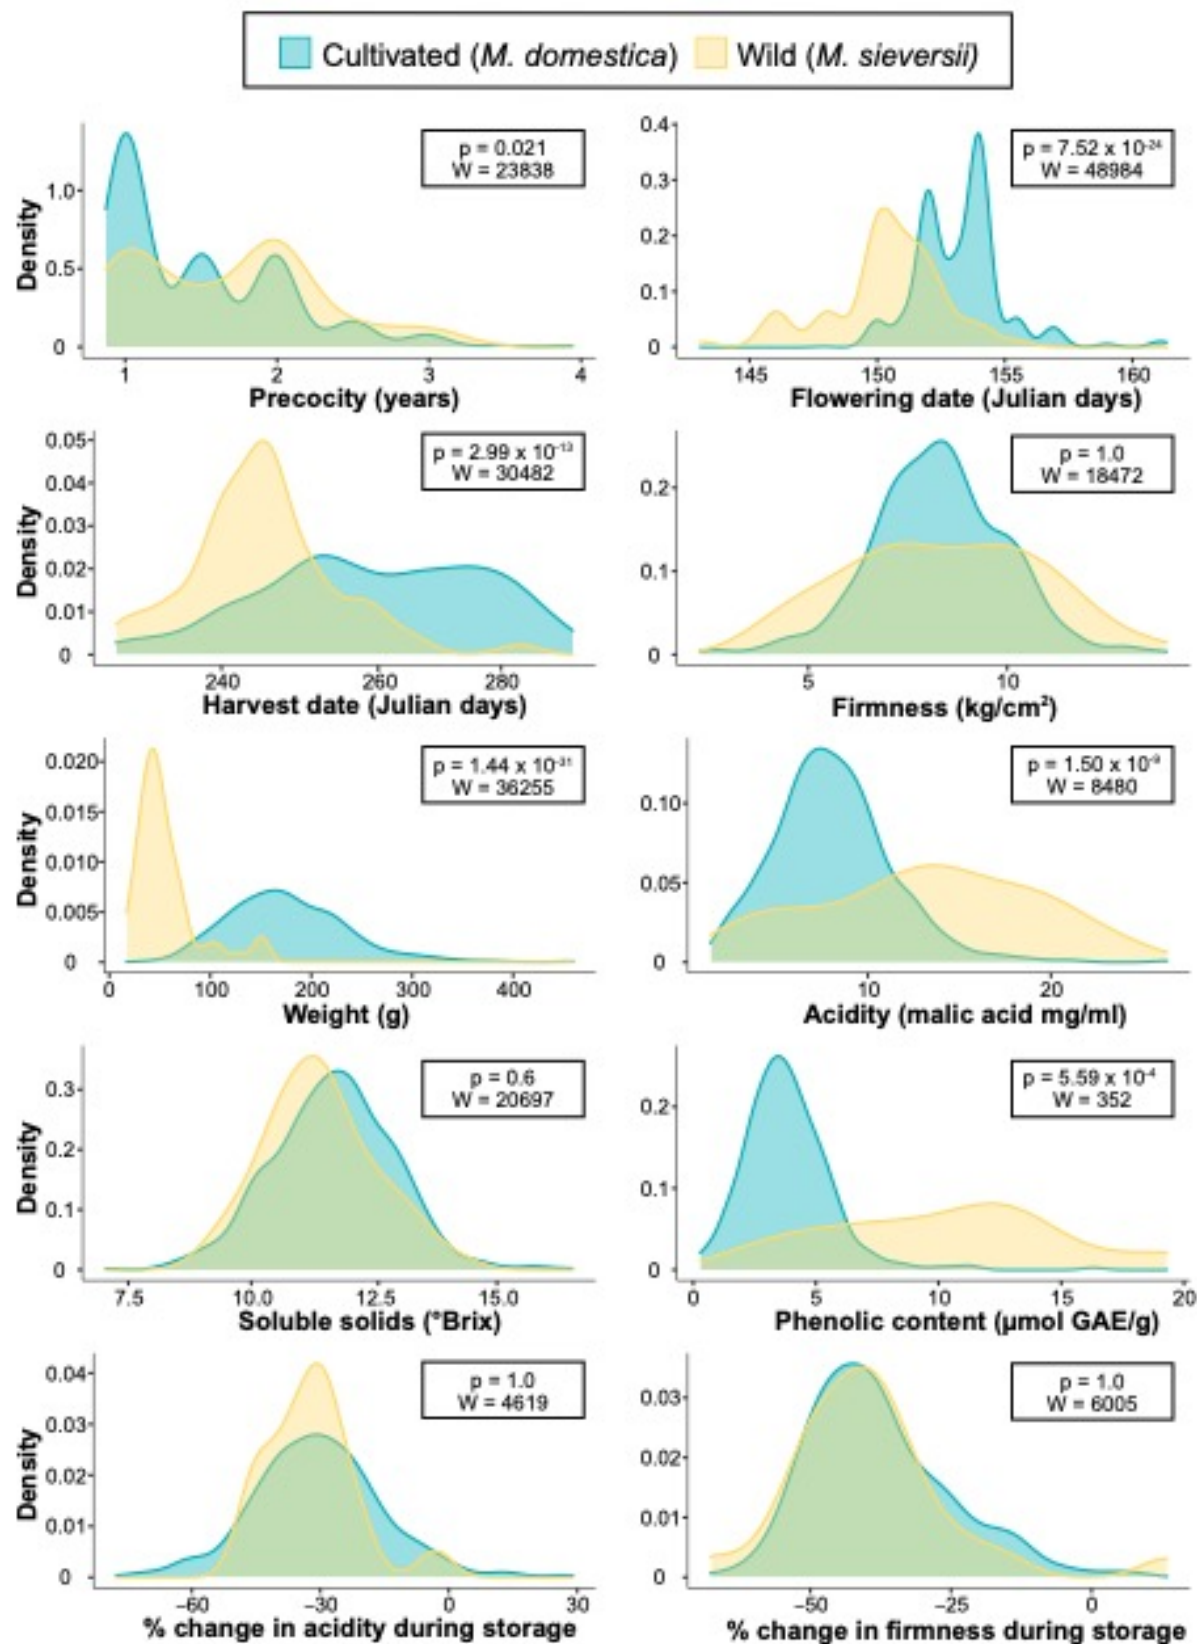

136 **Fig 2. Overlapping density plots of 10 phenotypes comparing values from wild and**  
137 **cultivated apples.** The phenotype associated with each plot is shown along the X axis. The W  
138 and Bonferroni-corrected p values report the results of performing a Wilcoxon rank sum test of  
139 the difference between the phenotypic distributions of wild and cultivated apples.  
140  
141 Wild and cultivated apples differed significantly for 6 of the 10 phenotypes tested, including  
142 precocity ( $W = 23838$ ,  $p = 0.021$ ), flowering date ( $W = 48984$ ,  $p = 7.52 \times 10^{-24}$ ), harvest date ( $W$   
143  $= 30482$ ,  $p = 2.99 \times 10^{-13}$ ), weight ( $W = 36255$ ,  $p = 1.44 \times 10^{-31}$ ), acidity ( $W = 8480$ ,  $p = 5.1 \times 10^{-9}$ ),  
144 and phenolic content ( $W = 352$ ,  $p = 5.59 \times 10^{-5}$ ). We found that, on average, cultivated apples  
145 produce flowers for the first time 21% (0.38 years) earlier than wild apples. Within a growing  
146 season, cultivated apples flower 3 days later, and are harvested 15 days later than wild apples.  
147 Cultivated apples are also 3.6 times heavier, 43% less acidic, and 68% lower in phenolic content  
148 than their wild progenitors. In comparison, wild and cultivated apples did not differ significantly  
149 for firmness, soluble solids, or changes in acidity or firmness during storage.

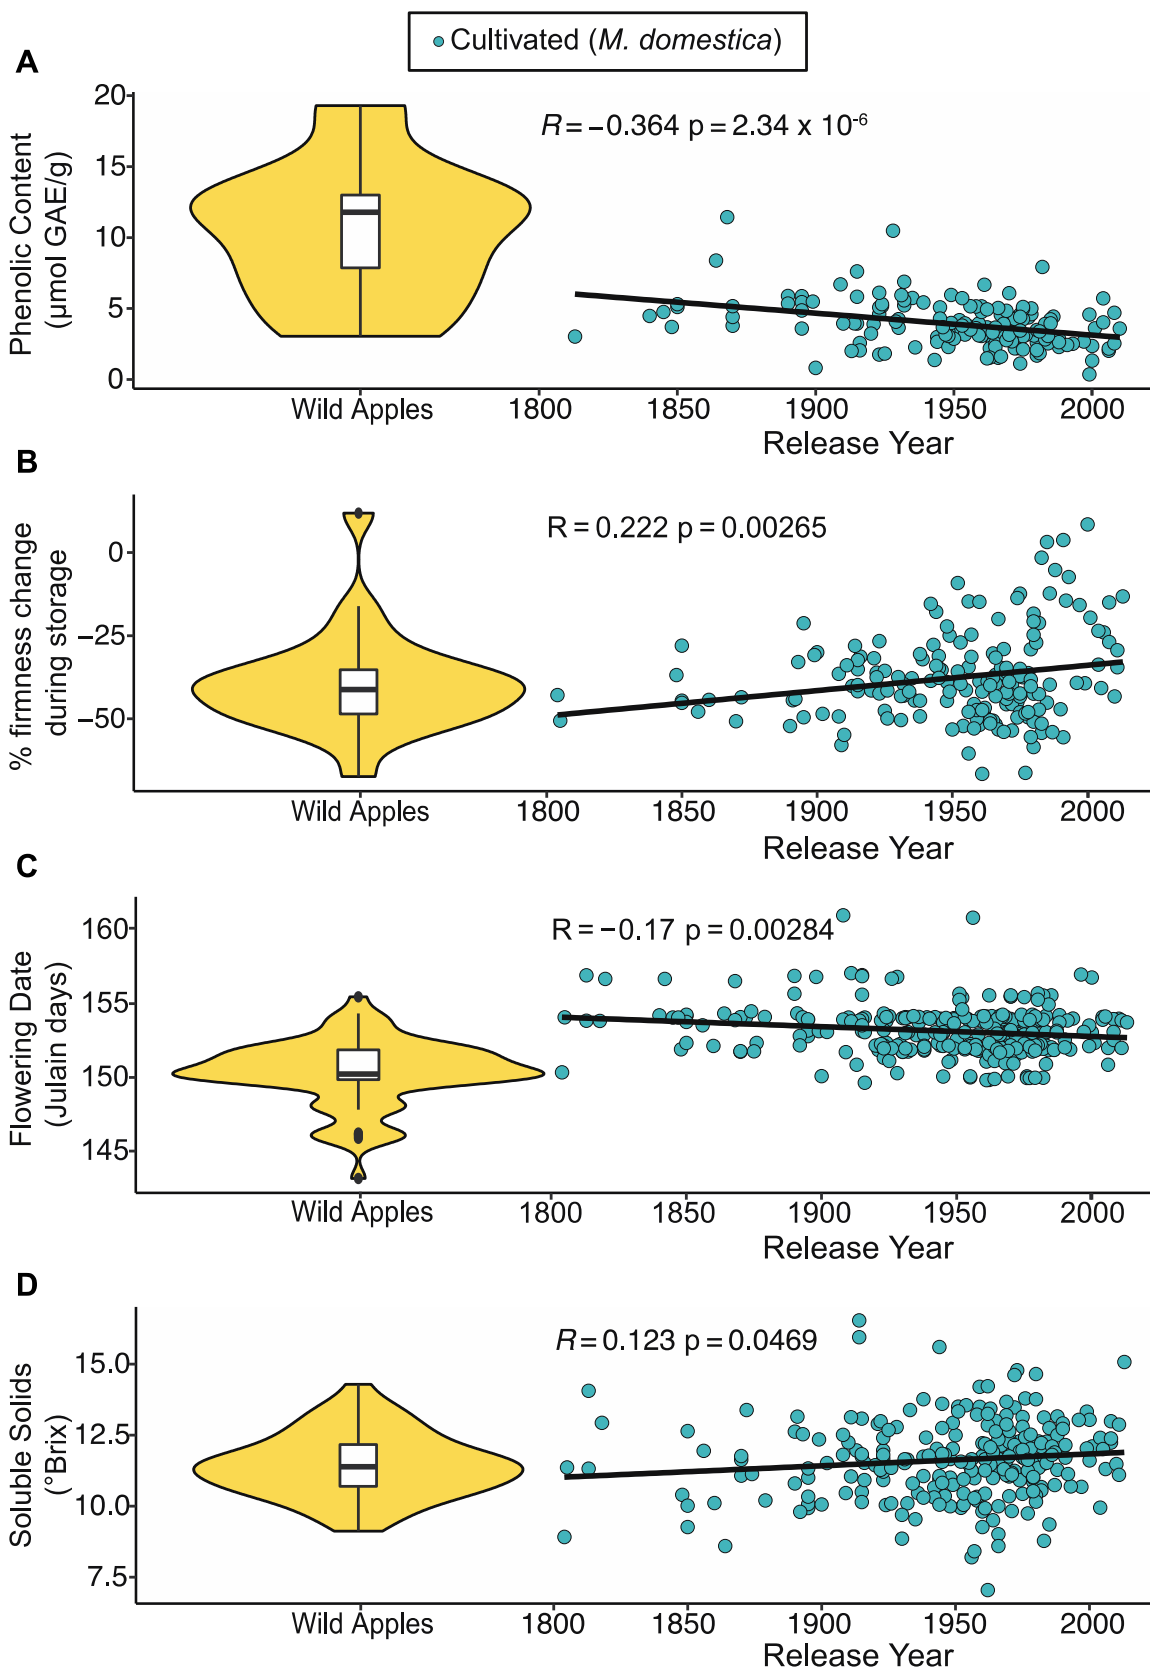

151 **Fig 3. Phenotype values of cultivated apples as a function of their release year with a**  
152 **comparison to values in their wild ancestor, *M. sieversii*. Phenotypes include phenolic**  
153 **content (A), firmness change during storage (B), flowering date (C), and soluble solids (D).**

154 Values for cultivated apples are blue, and the values observed for *M. sieversii* are represented in  
155 yellow as a violin plot on the left side of each plot. The R and p values from a Pearson  
156 correlation between phenotypic values and release year are shown within each scatter plot.

157  
158 To visualize phenotypic change within cultivated apples over time, apples' phenotypes are  
159 displayed as a function of their release year (Fig. 3 & Supplementary Fig. 1). We found  
160 significant correlations with release year for phenolic content ( $R = -0.364$ ,  $p = 2.34 \times 10^{-6}$ ), change  
161 in firmness during storage ( $R = 0.222$ ,  $p = 0.00265$ ), flowering date ( $R = -0.172$ ,  $p = 0.00247$ ),  
162 and soluble solids ( $R = 0.123$ ,  $p = 0.0469$ ) and determined that cultivated apples have shifted  
163 closer to the mean of wild apples for flowering date and firmness change, but further from the  
164 mean of wild apples for phenolic content and soluble solids.

165  
166 DISCUSSION

167  
168 Apples have been cultivated for over 3000 years, but because vegetative propagation has  
169 been practiced for 2000 years, it has been suggested that only about 100 generations have  
170 elapsed since apple domestication [26]. Despite this relatively short window for apple  
171 improvement, we found that cultivated apples are nearly entirely phenotypically distinct from  
172 their primary wild progenitor, *M. sieversii* (Fig. 1). Phenotypic differences are frequently used as  
173 an approximate measure of relatedness, and the separation in principal component space

174 observed here is in agreement with genomic studies that have shown significant differentiation  
175 between the genomes of *M. domestica* and *M. sieversii* [5,19]. It is worth acknowledging that we  
176 observed some overlap between wild and cultivated apples in phenotypic space. The PCA  
177 performed here made use of only 10 phenotypes, and it is possible that more differentiation  
178 would be observed with more measures of the apple phenome. Further, each variable in PCA  
179 should ideally capture an independent biological feature of apples. However, some phenotypes  
180 analysed here are correlated, such as harvest date and firmness [23], and their variation may be  
181 driven by the same biological feature [27]. Therefore, interpreting our PCA as a quantification of  
182 the degree of phenotypic differentiation between cultivated and wild apples should take these  
183 caveats into consideration.

184         We found significant differences between wild and cultivated apples for several  
185 phenology traits including precocity, flowering date, and harvest date (Fig. 2). Cultivated apple  
186 trees flower and bear fruit at a younger age. Due to the long juvenile phase of apple trees, plants  
187 with the ability to bear fruit earlier in their life cycle are desirable for growers because revenue is  
188 generated earlier. It is therefore possible that precocity has been selected for during apple  
189 improvement.

190         Flowering date was 17% (3 days) later in cultivated apples than wild apples. Frost during  
191 blossoming can cause loss, damage or reduced marketability of fruits [28], making flowering  
192 time an important consideration for growers when planting orchards. Additionally, apples with  
193 later flowering dates tend to be firmer [23,29], and firmer apples are preferred by consumers  
194 [30]. The later flowering date in cultivated apples could therefore be a by-product of selection for  
195 firm apples. Similarly, selection for firm apples may explain why cultivated apples were  
196 harvested 15 days later than wild apples, since harvest date and firmness are strongly correlated

197 [23,29]. It is well established that harvest date is a reliable predictor of fruit firmness, and these  
198 two phenotypes may be regulated by a common molecular pathway [27]. Thus, preference for  
199 firm fruit could be directly impacting the selection for apples with later harvest dates.

200 We found significant differences between cultivated and wild apples across multiple fruit  
201 traits including weight, acidity, and phenolic content (Fig. 2). Cultivated apples are 3.6x heavier  
202 than wild apples, in agreement with previous comparisons between these two species [31].  
203 Consumers prefer large, visually appealing fruit [32,33], so selection for large fruit size may  
204 explain our observation. We also found that cultivated apples are 43% less acidic than wild  
205 counterparts. Acidity contributes to the sour taste of apples, and apple preference is heavily  
206 influenced by acid/sugar ratios [34]. Given this relationship, it is not surprising that cultivated  
207 apples, which are primarily consumed as fresh fruit [35], have lower acid than wild apples but do  
208 not differ in soluble solid content. Finally, cultivated apples have, on average, 68% less phenolic  
209 content than wild apples. Phenolic compounds, which offer nutritional benefits [36], are partially  
210 responsible for the enzymatic browning that occurs when apple flesh is exposed to oxygen [37].  
211 Browning flesh is visually unappealing and typically results in negative effects on flavour,  
212 making apples that resist browning more appealing to producers and consumers [37]. In fact, the  
213 only genetically modified apple variety on the market today, Arctic™ Apples, was designed to  
214 silence genes related to enzymatic browning and was advertised as “the original nonbrowning  
215 apple” [38]. The human aversion to apple browning has likely contributed to the decline in  
216 phenolic content in cultivated apples, despite the nutritional benefits of such compounds. In  
217 addition, some evidence suggests that fruit size impacts polyphenol accumulation in apples [39],  
218 which could help explain why we observe lower phenolic content in cultivated apples.

219           According to the present analysis, many phenotypes of cultivated apples have  
220 dramatically changed since divergence from the primary progenitor species, *M. sieversii*. These  
221 differences represent phenotypic separation that could be leveraged in the improvement of  
222 cultivated apples, and emphasizes the potentially functional diversity provided by CWRs. While  
223 wild apples from this investigation may not offer improved fruit quality phenotypes that are  
224 currently attractive to consumers, they hold phenotypic variation that could be important for  
225 apple improvement in the future. For example, breeders could exploit the high phenolic content  
226 of wild apples to improve the nutritional quality of cultivated apples. Further, traits from wild  
227 apple varieties could potentially benefit the cider industry, which values high acidity and  
228 phenolic content [40].

229           Analysis of cultivated apple phenotypes as a function of release year revealed changes  
230 over the past 200 years in phenolic content, change in firmness during storage, flowering date,  
231 and soluble solids (Fig. 3). In particular, as shown previously [23], phenolic content has  
232 decreased over time. Phenolic content is associated with bitter taste [41], and modern varieties  
233 therefore likely taste less bitter on average than older varieties. Although selection for decreased  
234 bitterness could explain our observation, the relationship between low phenolic content and  
235 decreased flesh browning could also explain why modern cultivated apples tend to have less  
236 phenolics [42]. In comparison, wild apples tend to have higher phenolic content, indicating that  
237 cultivated varieties are diverging from the ancestral state. Similarly, more recently released apple  
238 cultivars soften less during storage than older cultivars, diverging from the ancestral state. The  
239 extended storage and long-distance shipment of apples has become increasingly routine over the  
240 past several decades, and selection for reduced softening during storage may explain why  
241 firmness retention has improved over time. Storage and transport have also been key targets in

242 tomato breeding [43], and the demand for fruit that performs well during extended storage and  
243 transport is unlikely to subside.

244 Flowering date is an important trait for apple production, and varies widely across the  
245 genus *Malus* [13]. Later flowering apple trees are less likely to be impacted by frost damage [28]  
246 and more likely to be firm [23], which is preferred by consumers. Despite the understood  
247 benefits of growing apples with later flowering dates, we found that more recently released  
248 varieties had earlier flowering dates. The trend towards earlier flowering varieties could indicate  
249 that selection for other traits has indirectly impacted flowering date. Alternatively, growers could  
250 be preferring earlier flowering varieties in an attempt to manage fruit ripening times during the  
251 harvest season. Cultivated varieties are trending towards the ancestral state of earlier flowering  
252 dates, which suggests that wild apples could offer valuable genetic material for breeding earlier  
253 harvested varieties.

254 Finally, we found that more modern cultivated apples are only slightly higher in soluble  
255 solid content. Previous investigations have reported that firm apples tend to have higher sugar  
256 content [10,29,44], so our observation that modern apple varieties tend to have higher SSC may  
257 be at least partially driven by recent selection for increased firmness. Further, a number of  
258 studies have suggested that the sugar content of apples is a key factor affecting consumer  
259 preference [14,30]. Although SSC is only a modest predictor of perceived sweetness [45],  
260 consumer's preference for sweet apples could underlie the upward trend in soluble solid content  
261 seen in modern cultivated apples.

262 Several caveats of the present analysis are worth noting. First, we only considered one of  
263 the multiple progenitor species of *M. domestica* here [6]. Therefore, only a fraction of the  
264 ancestry of the cultivated apple is captured by *M. sieversii*, and a more inclusive pool of ancestral



265 species would yield a more comprehensive comparison of wild and cultivated apples. Second, it  
266 is unknown how representative the current sample of wild apples is of the broader *M. sieversii*  
267 population. It is possible that the wild apple varieties within the ABC represent only an  
268 unrepresentative subset of *M. sieversii*, and thus do not accurately capture the diversity of the  
269 species. Further, there has been evidence of gene flow between cultivated and wild apples [46],  
270 which could mean that the wild species from the current investigation have experienced gene  
271 introgression from cultivated trees, and thus do not accurately represent the wild progenitor.  
272 Finally, the relatively small sample size in several comparisons limited the power of some of our  
273 analyses (Supplementary Fig. 2).

274 Our work demonstrates that cultivated and wild apples have diverged phenotypically, and  
275 that hundreds of years of apple improvement have shaped the variation in fruit and phenology we  
276 observe among cultivated apples today. Wild apples offer potentially valuable pools of genetic  
277 material that may be helpful for apple improvement. Future comprehensive phenomic  
278 evaluations, including metabolomic and transcriptomic analyses, across diverse wild apple  
279 species will help further assess the degree to which the apple's wild relatives may contribute to  
280 improving apple cultivar development.

281

282 SUPPLEMENTARY FIGURES

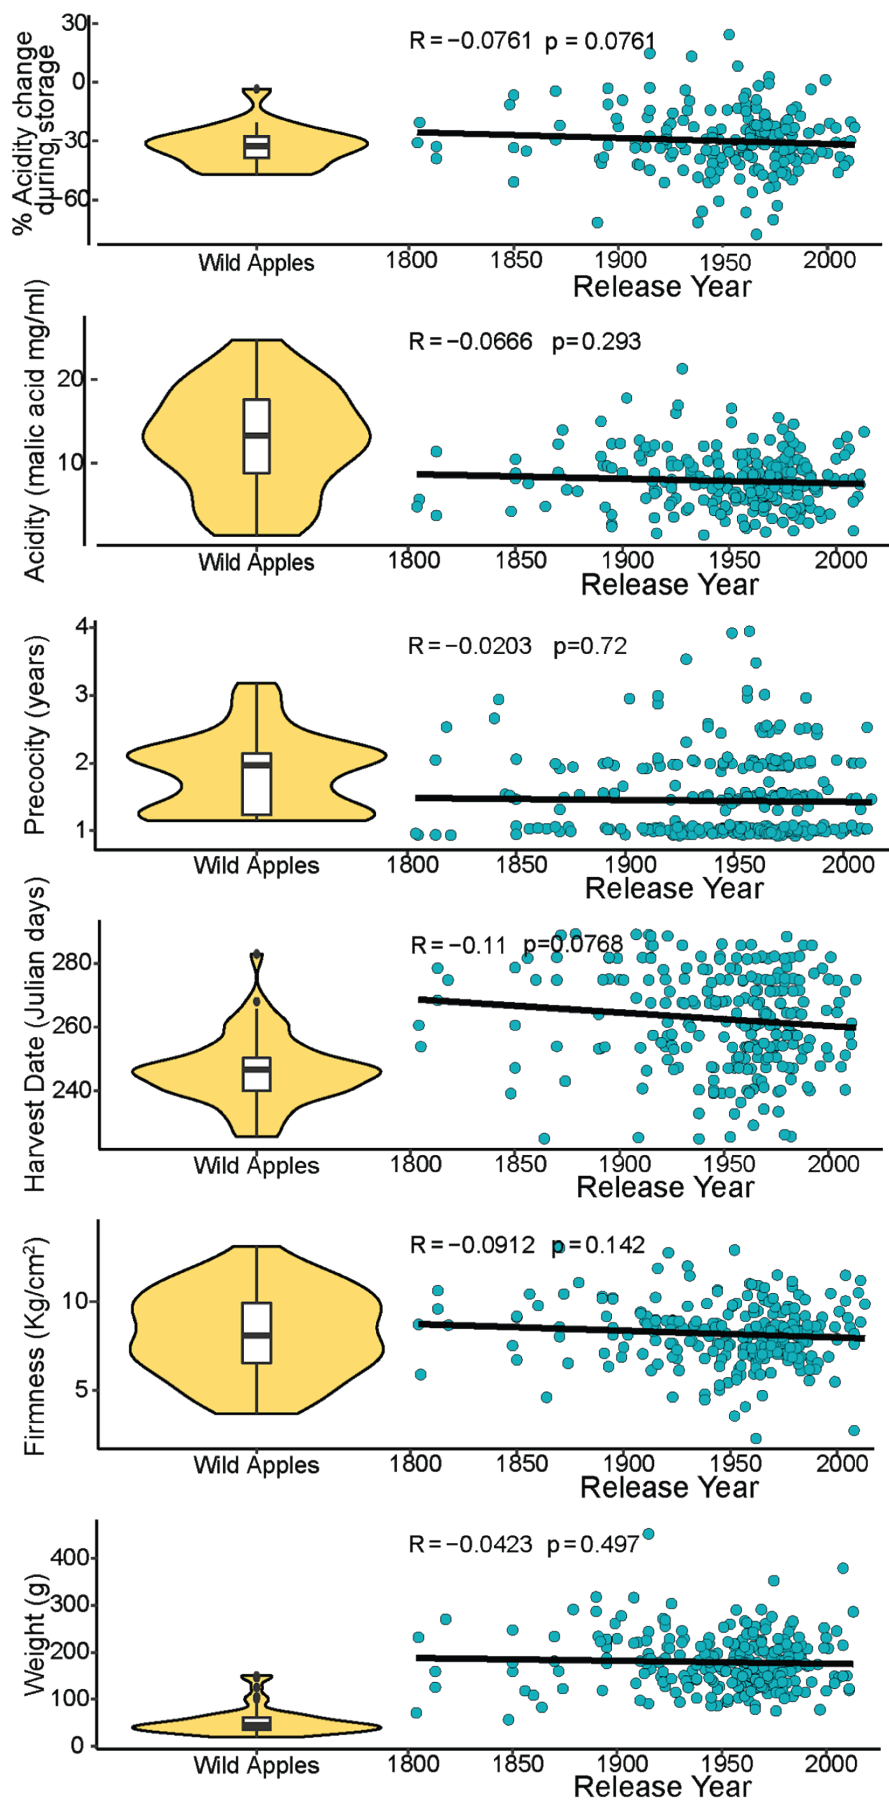

284 **Supplementary Figure 1. Phenotypes of cultivated apples as a function of their release year**  
285 **with a comparison to the ancestral state. Phenotypes include acidity change during storage,**  
286 **acidity, precocity, harvest date, firmness, and weight.** Cultivated apple scores for each  
287 phenotype are shown in blue, and the ancestral state of each phenotype is represented in yellow  
288 as a density distribution of values from *M. sieversii*. The R and p values from a Pearson  
289 correlation between phenotypic values and release year are shown within each scatter plot.

290

## 291 ACKNOWLEDGMENTS

292 **General:** The authors thank the Nova Scotia Fruit Growers' Association and the Farm Services  
293 team at AAFC-Kentville for their work in establishing and maintaining the trees studied here.  
294 We thank Tayab Soomro for useful discussion.

295

296 **Funding:** This work was supported by the National Science and Engineering Research Council  
297 of Canada. ZM was supported by the National Science Foundation Plant Genome Research  
298 Program 1546869.

299

300 **Competing interests:** The authors declare no competing interests.

301

302 **Data availability:** All data presented are freely available to the public via Watts et al. [23].

303 Statistical analyses are on GitHub at [https://github.com/MylesLab/Wild\\_vs\\_cultivated](https://github.com/MylesLab/Wild_vs_cultivated).

304

## 305 REFERENCES

- 306 1. Zohary D, Hopf M. Domestication of plants in the Old World: The origin and spread of  
307 cultivated plants in West Asia, Europe and the Nile Valley. Oxford University Press; 2000.

- 308 2. Cornille A, Giraud T, Smulders MJM, Roldán-Ruiz I, Gladieux P. The domestication and  
309 evolutionary ecology of apples. *Trends Genet.* 2014;30: 57–65.
- 310 3. Juniper BE, Mabberley DJ. *The story of the apple.* Timber Press (OR); 2006.
- 311 4. Ferree DC, Warrington IJ. *Apples: Botany, Production, and Uses.* CABI; 2003.
- 312 5. Duan N, Bai Y, Sun H, Wang N, Ma Y, Li M, et al. Genome re-sequencing reveals the  
313 history of apple and supports a two-stage model for fruit enlargement. *Nat Commun.*  
314 2017;8: 249.
- 315 6. Sun X, Jiao C, Schwaninger H, Chao CT, Ma Y, Duan N, et al. Phased diploid genome  
316 assemblies and pan-genomes provide insights into the genetic history of apple  
317 domestication. *Nat Genet.* 2020;52: 1423–1432.
- 318 7. Velasco R, Zharkikh A, Affourtit J, Dhingra A, Cestaro A, Kalyanaraman A, et al. The  
319 genome of the domesticated apple (*Malus × domestica* Borkh.). *Nat Genet.* 2010;42: 833–  
320 839.
- 321 8. FAOSTAT. FAOSTAT. In: Food and Agriculture Association of the United States  
322 [Internet]. 22 Dec 2020 [cited 7 Mar 2021]. Available: <http://www.fao.org/faostat/en/>
- 323 9. Jung M, Roth M, Aranzana MJ, Auwerkerken A, Bink M, Denancé C, et al. The apple  
324 REFPOP-a reference population for genomics-assisted breeding in apple. *Hortic Res.*  
325 2020;7: 189.
- 326 10. McClure KA, Gardner KM, Douglas GM, Song J, Forney CF, DeLong J, et al. A genome-  
327 wide association study of apple quality and scab resistance. *Plant Genome.* 2018;11: 1–14.
- 328 11. Urrestarazu J, Muranty H, Denancé C, Leforestier D, Ravon E, Guyader A, et al. Genome-  
329 Wide Association Mapping of Flowering and Ripening Periods in Apple. *Front Plant Sci.*  
330 2017;8: 1923.
- 331 12. Khan MA, Olsen KM, Sovero V, Kushad MM, Korban SS. Fruit quality traits have played  
332 critical roles in domestication of the apple. *Plant Genome.* 2014;7: 1.
- 333 13. Gottschalk C, van Nocker S. Diversity in seasonal bloom time and floral development  
334 among apple species and hybrids. *J Am Soc Hortic Sci.* 2013;138: 367–374.
- 335 14. Cliff MA, Stanich K, Lu R, Hampson CR. Use of descriptive analysis and preference  
336 mapping for early-stage assessment of new and established apples. *J Sci Food Agric.*  
337 2016;96: 2170–2183.
- 338 15. McClure KA, Gong Y, Song J, Vinqvist-Tymchuk M, Campbell Palmer L, Fan L, et al.  
339 Genome-wide association studies in apple reveal loci of large effect controlling apple  
340 polyphenols. *Hortic Res.* 2019;6: 107.
- 341 16. Wu B, Shen F, Wang X, Zheng WY, Xiao C, Deng Y, et al. Role of MdERF3 and

- 342 MdERF118 natural variations in apple flesh firmness/crispness retainability and  
343 development of QTL-based genomics-assisted prediction. *Plant Biotechnol J.* 2020.  
344 doi:10.1111/pbi.13527
- 345 17. Iezzoni AF, McFerson J, Luby J, Gasic K, Whitaker V, Bassil N, et al. RosBREED:  
346 bridging the chasm between discovery and application to enable DNA-informed breeding in  
347 rosaceous crops. *Horticulture Research.* 2020;7: 177.
- 348 18. WAPA. U.S. Apple and Pear Forecast. In: WAPA - The World Apple and Pear Association  
349 [Internet]. Dec 2018 [cited 26 Oct 2020]. Available: [http://www.wapa-](http://www.wapa-association.org/asp/page_1.asp?doc_id=447)  
350 [association.org/asp/page\\_1.asp?doc\\_id=447](http://www.wapa-association.org/asp/page_1.asp?doc_id=447)
- 351 19. Migicovsky Z, Gardner KM, Richards C, Thomas Chao C, Schwaninger HR, Fazio G, et al.  
352 Genomic consequences of apple improvement. *Hortic Res.* 2021;8: 9.
- 353 20. McCouch S, Baute GJ, Bradeen J, Bramel P, Bretting PK, Buckler E, et al. Agriculture:  
354 Feeding the future. *Nature.* 2013;499: 23–24.
- 355 21. Pimentel D, Wilson C, McCullum C, Huang R, Dwen P, Flack J, et al. Economic and  
356 Environmental Benefits of Biodiversity. *Bioscience.* 1997;47: 747–757.
- 357 22. Furbank RT, Tester M. Phenomics--technologies to relieve the phenotyping bottleneck.  
358 *Trends Plant Sci.* 2011;16: 635–644.
- 359 23. Watts S, Migicovsky Z, Yu C, McClure K, Butler L, Sawler J, et al. Quantifying apple  
360 diversity: a phenomic characterization of Canada's Apple Biodiversity Collection. In  
361 *Review.* 2021.
- 362 24. R Core Team. R: A language and environment for statistical computing. 2020.
- 363 25. Wickham H. *ggplot2: Elegant Graphics for Data Analysis.* 2016.
- 364 26. Spengler RN. Origins of the Apple: The Role of Megafaunal Mutualism in the  
365 Domestication of *Malus* and Rosaceous Trees. *Front Plant Sci.* 2019;10: 617.
- 366 27. Migicovsky Z, Yeats TH, Watts S, Song J, Forney CF, Burgher-MacLellan K, et al. Apple  
367 ripening is controlled by a NAC transcription factor. *Cold Spring Harbor Laboratory.* 2021.  
368 p. 708040. doi:10.1101/708040
- 369 28. Eccel E, Rea R, Caffarra A, Crisci A. Risk of spring frost to apple production under future  
370 climate scenarios: the role of phenological acclimation. *Int J Biometeorol.* 2009;53: 273–  
371 286.
- 372 29. Nybom H, Ahmadi-Afzadi M, Sehic J, Hertog M. DNA marker-assisted evaluation of fruit  
373 firmness at harvest and post-harvest fruit softening in a diverse apple germplasm. *Tree*  
374 *Genet Genomes.* 2013;9: 279–290.
- 375 30. Harker FR, Kupferman EM, Marin AB, Gunson FA, Triggs CM. Eating quality standards

- 376 for apples based on consumer preferences. *Postharvest Biol Technol.* 2008;50: 70–78.
- 377 31. Kumar S, Raulier P, Chagné D, Whitworth C. Molecular-level and trait-level differentiation  
378 between the cultivated apple (*Malus× domestica* Borkh.) and its main progenitor *Malus*  
379 *sieversii*. *Plant Genetic Resources; Cambridge.* 2014;12: 330–340.
- 380 32. Carew R, Smith EG. The value of apple characteristics to wholesalers in western Canada: A  
381 hedonic approach. *Can J Plant Sci.* 2004;84: 829–835.
- 382 33. Skreli E, Imami D. Analyzing consumers’ preferences for apple attributes in Tirana,  
383 Albania. *International Food and Agribusiness Management Review.* 2012;15: 137–157.
- 384 34. Hampson CR, Quamme HA, Hall JW, MacDonald RA, King MC, Cliff MA. Sensory  
385 evaluation as a selection tool in apple breeding. *Euphytica.* 2000;111: 79–90.
- 386 35. Lutes H. The Facts on Conventional and Non-Browning Apples - CropLife.ca. CropLife  
387 Canada; 23 Jul 2019 [cited 26 Oct 2020]. Available: <https://croplife.ca/facts-figures/apples/>
- 388 36. Lin D, Xiao M, Zhao J, Li Z, Xing B, Li X, et al. An Overview of Plant Phenolic  
389 Compounds and Their Importance in Human Nutrition and Management of Type 2  
390 Diabetes. *Molecules.* 2016;21: 1374.
- 391 37. Holderbaum DF, Kon T, Kudo T, Guerra MP. Enzymatic Browning, Polyphenol Oxidase  
392 Activity, and Polyphenols in Four Apple Cultivars: Dynamics during Fruit Development.  
393 *HortScience.* 2010;45: 1150–1154.
- 394 38. Stowe E, Dhingra A. Development of the Arctic® Apple. *Plant Breed Rev.* 2020;44: 273–  
395 296.
- 396 39. Busatto N, Matsumoto D, Tadiello A, Vrhovsek U, Costa F. Multifaceted analyses disclose  
397 the role of fruit size and skin-russeting in the accumulation pattern of phenolic compounds  
398 in apple. *PLoS One.* 2019;14: e0219354.
- 399 40. Mattila P, Hellström J, Törrönen R. Phenolic acids in berries, fruits, and beverages. *J Agric*  
400 *Food Chem.* 2006;54: 7193–7199.
- 401 41. Soares S, Kohl S, Thalmann S, Mateus N, Meyerhof W, De Freitas V. Different phenolic  
402 compounds activate distinct human bitter taste receptors. *J Agric Food Chem.* 2013;61:  
403 1525–1533.
- 404 42. Toivonen PMA. Fresh-cut apples: Challenges and opportunities for multi-disciplinary  
405 research. *Can J Plant Sci.* 2006;86: 1361–1368.
- 406 43. Kramer MG, Redenbaugh K. Commercialization of a tomato with an antisense  
407 polygalacturonase gene: The FLAVR SAVR™ tomato story. *Euphytica.* 1994;79: 293–297.
- 408 44. Migicovsky Z, Gardner KM, Money D, Sawler J, Bloom JS, Moffett P, et al. Genome to  
409 Phenome Mapping in Apple Using Historical Data. *Plant Genome.* 2016;9.

410           doi:10.3835/plantgenome2015.11.0113

411   45.   Aprea E, Charles M, Endrizzi I, Laura Corollaro M, Betta E, Biasioli F, et al. Sweet taste in  
412       apple: the role of sorbitol, individual sugars, organic acids and volatile compounds. *Sci Rep.*  
413       2017;7: 44950.

414   46.   Cornille A, Gladieux P, Giraud T. Crop-to-wild gene flow and spatial genetic structure in  
415       the closest wild relatives of the cultivated apple. *Evol Appl.* 2013;6: 737–748.

416
